# Supplementary material for: Urdu Translation and Cross-Cultural Adaptation of Canadian Assessment of Physical Literacy-2 (CAPL-2) Questionnaires: A Reliability Analysis in Pakistani Children
Source: Hindawi journal article supplement (doi:10.1155/2024/9611010), 2024-02-29

## کینیڈین جسمانی خواندگی کی تشخیص کا سوالنامہ - دوسرا ایڈیشن (CAPL-2)

کچھ اپنے بارے میں بتائیں!

براہ کرم ہر سوال کے لیے ایک نمبر، یا لفظ، یا انتخاب پر دائرہ لگائیں۔

آپ کس اسکول کے گریڈ میں ہیں؟

- اگر آپ آج اسکول میں نہیں ہیں، تو براہ کرم اس گریڈ پر دائرہ لگائیں جس میں آپ اسکول جائیں گے۔

0 1 2 3 4 5 6 7 8

آپ کیا ہیں؟

لڑکا = 1 لڑکی = 2

آپ کی سالگرہ کس مہینے میں ہے؟

جنوری، فروری، مارچ، اپریل، مئی، جون، جولائی، اگست، ستمبر، اکتوبر، نومبر، دسمبر۔

آپ کتنے سال کے ہیں؟

آٹھ سال، نو سال، دس سال، گیارہ سال، بارہ سال۔

آپ جسمانی سرگرمی کے بارے میں کیا سوچتے ہیں؟

جب ہم آپ سے جسمانی سرگرمی کے بارے میں پوچھ رہے ہیں، تو ہمارا مطلب ہے کہ آپ کب گھومتے پھرتے ہیں، کھیلتے ہیں یا ورزش کر رہتے ہیں۔ جسمانی سرگرمی کوئی بھی ایسی سرگرمیاں ہوتی ہیں، جو آپ کے دل کی دھڑکن کو تیز کرتی ہے یا آپ کے سانس لینے کی رفتار کو بڑھا دیتی ہے۔

ہم آپ سے یہ سوالات کیوں پوچھ رہے ہیں؟

ہم جاننا چاہتے ہیں کہ آپ جیسے بچے جسمانی سرگرمیوں، کھیل اور ورزش کے بارے میں کیا سوچتے ہیں۔

برائے مہربانی یاد رکھیں:

کوئی صحیح یا غلط جواب نہیں ہیں! ہم صرف یہ جاننا چاہتے ہیں کہ آپ کیا سوچتے ہیں۔

اگر آپ کو جواب نہیں معلوم تو براہ کرم اپنا بہترین اندازے کا انتخاب کریں۔

اس سوال نامہ کو مکمل کرنے کیلئے وقت کی کوئی حد نہیں ہے۔

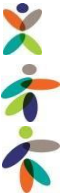

## مندرجہ ذیل میں کون سا آپ سے قریب تر مطابقت رکھتا ہے۔

ہر سوال کے لیے، آپ کو دو جملے پڑھنا ہوں گے اور پھر اس جملے پر دائرہ بنائیں جو آپ کو لگتا ہے کہ آپ سے زیادہ مشابہت رکھتا ہے۔

درجہ ذیل نمونہ سوال نمبر 1 آزمائیں:

|                                      |      |                                         |
|--------------------------------------|------|-----------------------------------------|
| کچھ بچوں کے چہرے پر ایک ناک ہوتی ہے۔ | لیکن | دوسرے بچوں کے چہرے پر تین ناک ہوتی ہیں۔ |
|--------------------------------------|------|-----------------------------------------|

آپ کے لیے فیصلہ کرنا اتنا مشکل نہیں ہونا چاہیے!

ایک بار جب آپ اس جملے میں جواب جو کہ آپ محسوس کرتے ہیں کہ آپ اس سے زیادہ مشابہت رکھتے ہیں اس پر دائرہ لگائیں، تو آپ کو فیصلہ کرنا ہوگا کہ آیا یہ واقعی آپ کے لیے درست ہے یا آپ کے لیے کچھ حد تک درست ہے۔

یہاں آپ کے لیے ایک اور نمونہ سوال ہے۔ یاد رکھیں، سوال کا جواب دینے کے لیے آپ کو دو چیزیں کرنے کی ضرورت ہے:

اول۔ پہلے، اس جملے پر دائرہ لگائیں جو کہ آپ محسوس کرتے ہیں کہ آپ کے جواب سے زیادہ مشابہت رکھتا ہے۔

دوم۔ پھر، صحیح باکس میں ایک چیک لگائیں اگر آپ یہ محسوس کرتے ہیں کہ آپ کے جواب سے زیادہ مشابہت رکھتا ہے یا آپ کے لیے کچھ حد تک مشابہت رکھتا ہے۔

کوئی صحیح یا غلط جوابات نہیں ہیں، بس ہمیں بتائیں کہ آپ کیا سوچتے ہیں کہ کون سا جواب آپ کے جواب سے زیادہ مشابہت رکھتا ہے!

### نمونہ سوال نمبر 2

|                                               |                                              |                                                  |
|-----------------------------------------------|----------------------------------------------|--------------------------------------------------|
| کچھ بچے کمپیوٹر کے ساتھ کھیلنا پسند کرتے ہیں۔ | لیکن                                         | دوسرے بچے کمپیوٹر کے ساتھ کھیلنا پسند نہیں کرتے۔ |
| <input type="checkbox"/> میں بالکل ایسا ہوں۔  | <input type="checkbox"/> میں بالکل ایسا ہوں۔ | <input type="checkbox"/> کچھ حد تک میں ایسا ہے۔  |

اب آپ اس فارم کو بھرنے کے لیے تیار ہیں۔ یاد رکھیں، ہر باکس میں آپ کو اس جواب پر دائرہ لگانا ہوگا جو آپ کی رائے سے زیادہ مشابہت رکھتا ہے یا آپ کی رائے سے کچھ حد تک مشابہت رکھتا ہے۔ اس باکس کو نشان زد کریں۔ اپنی ضرورت کے مطابق درکار وقت استعمال کریں اور پورے فارم کو احتیاط سے پر کریں۔ اگر آپ کے ٹاس سوالات ہیں، تو پوچھیں! اگر آپ کو لگتا ہے کہ آپ تیار ہیں تو آپ ابھی شروع کر سکتے ہیں۔

ہر صفحہ کو ضرور پُر کریں!

## کون سا جملہ آپ کے جواب سے زیادہ مشابہت رکھتا ہے!

سوال نمبر: 1

|                                           |      |                                                      |
|-------------------------------------------|------|------------------------------------------------------|
| کچھ بچے متحرک کھیل کھیلنا پسند نہیں کرتے۔ | لیکن | دوسرے بچے متحرک کھیل کھیلنا بہت زیادہ پسند کرتے ہیں۔ |
| □ میں بالکل ایسا ہوں۔                     |      | □ میں بالکل ایسا ہوں۔                                |
| □ کچھ حد تک میں ایسا ہے۔                  |      | □ کچھ حد تک میں ایسا ہے۔                             |

سوال نمبر: 2

|                                         |      |                                               |
|-----------------------------------------|------|-----------------------------------------------|
| کچھ بچے متحرک کھیلوں میں اچھے ہوتے ہیں۔ | لیکن | دوسرے بچوں کو متحرک کھیل کھیلنا مشکل لگتا ہے۔ |
| □ میں بالکل ایسا ہوں۔                   |      | □ میں بالکل ایسا ہوں۔                         |
| □ کچھ حد تک میں ایسا ہے۔                |      | □ کچھ حد تک میں ایسا ہے۔                      |

سوال نمبر: 3

|                                                 |      |                                               |
|-------------------------------------------------|------|-----------------------------------------------|
| کچھ بچوں کو کھیل کھیلنے میں زیادہ مزہ نہیں آتا۔ | لیکن | دوسرے بچوں کو کھیل کھیلنا زیادہ اچھا لگتا ہے۔ |
| □ میں بالکل ایسا ہوں۔                           |      | □ میں بالکل ایسا ہوں۔                         |
| □ کچھ حد تک میں ایسا ہے۔                        |      | □ کچھ حد تک میں ایسا ہے۔                      |

سوال نمبر: 4

|                                                               |      |                                               |
|---------------------------------------------------------------|------|-----------------------------------------------|
| کچھ بچے زیادہ تر کھیلوں میں اچھی کارکردگی کا مظاہرہ کرتے ہیں۔ | لیکن | دوسرے بچوں کو کھیل کھیلنا مشکل محسوس ہوتا ہے۔ |
| □ میں بالکل ایسا ہوں۔                                         |      | □ میں بالکل ایسا ہوں۔                         |
| □ کچھ حد تک میں ایسا ہے۔                                      |      | □ کچھ حد تک میں ایسا ہے۔                      |

سوال نمبر: 5

|                                              |      |                                     |
|----------------------------------------------|------|-------------------------------------|
| دوسرے بچے کھیل کھیلنے سے لطف اندوز ہوتے ہیں۔ | لیکن | کچھ بچے کھیل کھیلنا پسند نہیں کرتے۔ |
| □ میں بالکل ایسا ہوں۔                        |      | □ میں بالکل ایسا ہوں۔               |
| □ کچھ حد تک میں ایسا ہے۔                     |      | □ کچھ حد تک میں ایسا ہے۔            |

سوال نمبر: 6

|                                                  |      |                                                 |
|--------------------------------------------------|------|-------------------------------------------------|
| کچھ بچے باآسانی متحرک کھیل کھیلنا سیکھ سکتے ہیں۔ | لیکن | دوسرے بچے متحرک کھیل سیکھنا مشکل محسوس ہوتا ہے۔ |
| □ میں بالکل ایسا ہوں۔                            |      | □ میں بالکل ایسا ہوں۔                           |
| □ کچھ حد تک میں ایسا ہے۔                         |      | □ کچھ حد تک میں ایسا ہے۔                        |

ہمیں یہ بتانے کا شکریہ کہ کون سے بچے آپ سے زیادہ مشابہت رکھتے ہیں۔

ہمارے پاس صرف چند مزید سوالات ہیں۔ براہ کرم اگلے صفحہ پر جائیں۔

## آپ جسمانی طور پر متحرک کیوں ہیں؟

لڑکے اور لڑکیاں ہر طرح کے کام کرنے سے متحرک ہو سکتے ہیں :

- ورزش (چلنے پھرنے سے، تندرست رہنے سے، یا جم کلاس سے)۔
- باہر کھیلنے یا متحرک رہنے والی سرگرمیاں کرنے (جیسے پارک میں کھیلنے سے)۔
- کھیل (جیسے کہ فٹ بال، ٹینس، ہاکی، رقص، یا تیراکی سے)۔

مندرجہ ذیل میں سے وہ کون سی وجوہات ہیں جن کی وجہ سے آپ متحرک ہیں۔

حوصلہ افزائی = 7.5

براہ کرم ہر ایک جملہ پڑھیں اور ہمیں بتائیں کہ یہ آپ کے لیے کس حد تک درست ہے۔

| میں متحرک ہوں کیونکہ...  |                          |                           |                                  |                          |                                         |
|--------------------------|--------------------------|---------------------------|----------------------------------|--------------------------|-----------------------------------------|
| میرے لیے بالکل درست ہے۔  | اکثر میرے لیے سچ ہے۔     | بعض اوقات میرے لئے سچ ہے۔ | میرے لیے بالکل بھی درست نہیں ہے۔ | میرے لیے درست نہیں ہے۔   |                                         |
| <input type="checkbox"/> | <input type="checkbox"/> | <input type="checkbox"/>  | <input type="checkbox"/>         | <input type="checkbox"/> | 1 متحرک رہنے میں مزہ ہے۔                |
| <input type="checkbox"/> | <input type="checkbox"/> | <input type="checkbox"/>  | <input type="checkbox"/>         | <input type="checkbox"/> | 2 میں متحرک رہنے سے لطف اندوز ہوتا ہوں۔ |
| <input type="checkbox"/> | <input type="checkbox"/> | <input type="checkbox"/>  | <input type="checkbox"/>         | <input type="checkbox"/> | 3 مجھے متحرک رہنا پسند ہے۔              |

## آپ کو متحرک رہنے میں کیسا محسوس ہوتا ہے؟

لگنے حصے میں کچھ جملے ہیں جن میں یہ بیان کیا گیا ہے کہ لڑکیاں اور لڑکے متحرک رہنے اور متحرک سرگرمیاں کرنے کے بارے میں کیسا محسوس کرتے ہیں (جیسے متحرک کھیل کھلنے، باہر کھیلنے، اور کھیل کھیلنے میں)۔

جسمانی سرگرمی کی اہلیت = 7.5

براہ کرم ہر جملہ پڑھیں اور ہمیں بتائیں کہ ہر جملہ کتنا آپ اپنے سے قریب تر محسوس کرتے ہیں۔

| میں اس طرح بالکل بھی نہیں ہوں۔ | واقعی میری طرح نہیں۔     | بعض اوقات میں اس طرح ہوتا ہوں۔ | بالکل میں اس طرح کا ہوں۔ | واقعی میں اسی طرح کا ہوں۔ |                                                                                               |
|--------------------------------|--------------------------|--------------------------------|--------------------------|---------------------------|-----------------------------------------------------------------------------------------------|
| <input type="checkbox"/>       | <input type="checkbox"/> | <input type="checkbox"/>       | <input type="checkbox"/> | <input type="checkbox"/>  | 4 جب بات متحرک کھیل کھیلنے کی ہو تو مجھے لگتا ہے کہ میں بہت اچھا ہوں۔                         |
| <input type="checkbox"/>       | <input type="checkbox"/> | <input type="checkbox"/>       | <input type="checkbox"/> | <input type="checkbox"/>  | 5 مجھے لگتا ہے کہ میں دوسرے بچوں کے مقابلے میں سرگرمیوں میں اچھی کارکردگی کا مظاہرہ کرتا ہوں۔ |
| <input type="checkbox"/>       | <input type="checkbox"/> | <input type="checkbox"/>       | <input type="checkbox"/> | <input type="checkbox"/>  | 6 جب بات متحرک ہونے کی ہو تو میرے پاس اچھی صلاحیتیں ہیں۔                                      |

## آپ جسمانی سرگرمی کے بارے میں کیا جانتے ہیں؟

براہ کرم ہر سوال کے لیے صرف ایک جواب کا دائرہ لگائیں جو آپ درست لگتا ہو۔

اول۔ آپ اور دوسرے بچوں کو روزانہ کتنے منٹ جسمانی سرگرمیاں کرنی چاہئیں جو آپ کے دل کی دھڑکن کو تیز کرتی ہیں اور آپ کو تیز سانس لینے پر مجبور کرتی ہیں، جیسے تیز چلنا یا دوڑنا؟ اس وقت کو شمار کریں جب آپ کو اسکول میں متحرک رہنا چاہئے اور اس وقت بھی جب آپ گھر یا اپنے پڑوس میں ہوں۔

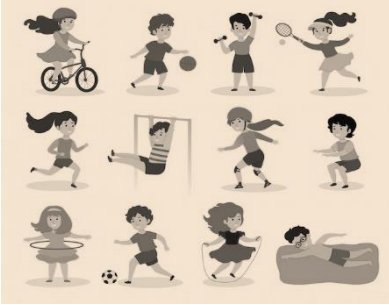

اول - 20 منٹ

دوم - 30 منٹ

سوم - 60 منٹ یا 1 گھنٹہ

چہارم - 120 منٹ یا 2 گھنٹے

دوم۔ فٹنس کی بہت سی اقسام ہیں۔ ایک قسم کو برداشت و قوت کی فٹنس، یا ایروبک فٹنس، یا قلبی فٹنس کہا جاتا ہے۔ قلبی فٹنس کی فٹنس کا مطلب کیا ہے:

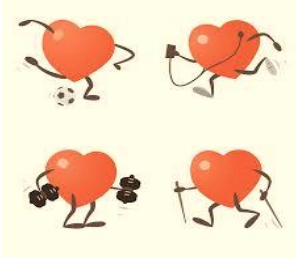

اول۔ عضلات کتنی اچھی طرح سے دھکیل، گھسیٹ یا کھینچ سکتے ہیں۔

دوم۔ دل کتنی اچھی طرح سے خون پمپ کر سکتا ہے اور پھیپھڑے کو آکسیجن فراہم کر سکتا ہے۔

سوم۔ ہمارے قد کے مطابق صحت مند وزن رکھنا۔

چہارم۔ کھیلوں کو کھیلنے کی ہماری صلاحیت جو ہمیں پسند ہے۔

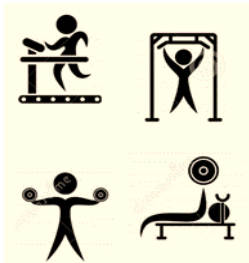

سوم۔ پٹھوں کی طاقت یا پٹھوں کی برداشت کا مطلب ہے:

اول۔ عضلات کتنی اچھی طرح سے دھکیل، گھسیٹ یا پھیلا سکتے ہیں۔

دوم۔ دل کتنی اچھی طرح سے خون پمپ کر سکتا ہے اور پھیپھڑے کو آکسیجن فراہم کر سکتا ہے۔

سوم۔ صحت مند وزن ہمارے قد کے مطابق۔

چہارم۔ کھیلوں کو کھیلنے کی ہماری صلاحیت جو ہمیں پسند ہے۔

چہارم۔ اگر آپ کھیل کی مہارت میں بہتر ہونا چاہتے ہیں (جیسے گیند کو لات مارنا اور پکڑنا) تو بہتری لانے کے لیے کیا کرنا بہتر ہوگا؟

اول۔ گیند کو لات مارنے اور پکڑنے کے بارے میں ایک کتاب پڑھیں۔

دوم۔ جب تک آپ بوڑھے نہ ہو جائیں انتظار کریں۔

سوم۔ ورزش کرنے یا زیادہ فعال رہنے کی کوشش کریں۔

چہارم۔ ایک ویڈیو دیکھیں، سبق لیں، یا کسی کوچ سے لات مارنے اور کچ کرنے کا طریقہ سیکھیں۔

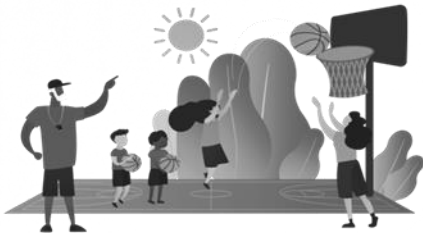

**پنجم۔** عیدہ کے متعلق اس کہانی میں کچھ الفاظ گمشدہ ہیں۔ کہانی میں گمشدہ الفاظ کو بھرنے کے لیے خانے میں موجود الفاظ میں سے انتخاب کریں۔ ہر لفظ کہانی میں صرف ایک خالی جگہ کو بھرنے کے لیے استعمال کیا جا سکتا ہے۔ لفظوں کی تعداد خالی جگہوں سے زیادہ ہے، لہذا تمام الفاظ استعمال نہیں ہوں گے۔

|           |                          |             |
|-----------|--------------------------|-------------|
| فُوت      | ہاتھ پیر پھیلانے کی ورزش | تفریح و مزہ |
| فائدہ مند | سانس لینا                | نبض دیکھنا  |
| کھیل      | برا                      | طاقت        |

عیدہ ہر روز متحرک رہنے کی کوشش کرتی ہے۔ ہر روز دوڑنا اس کے دل اور پھیپھڑوں (جسمانی عضلت) کے لیے اچھا ہے۔ عیدہ کا خیال ہے کہ جسمانی سرگرمی اسکے لیے \_\_\_ اور اس میں اسے \_\_\_ بھی آتا ہے۔ اپنی اسپورٹس ٹیم کی مشق میں کے دوران وہ زیادہ دوڑتی ہے تاکہ وہ اپنی ڈوڑنے کی \_\_\_ کو بہتر بنا سکے۔ ٹیم کی مشق میں کے دوران وہ ڈنڈ پیلنے (Push-Up) اور اٹھک بیٹھک جیسی ورزشیں بھی کرتی ہے جس سے اس کی جسمانی \_\_\_ میں اضافہ ہوتا ہے۔ اختتام پر جسم کو ٹھنڈا کرتے ہوئے وہ \_\_\_ کرتی ہے تاکہ اپنے جسم کی لچک کو بہتر اور دل کی دھڑکن سست کر سکے۔ ورزش کرنے کے بعد وہ اپنے دل کی دھڑکن کی جانچ کرتی ہے جسے \_\_\_ کہا جاتا ہے۔

**ششدم۔** پچھلے ہفتے (7 دن) کے دوران، آپ کل کتنے دنوں میں کم از کم 60 منٹ فی دن جسمانی طور پر متحرک رہے؟ آس وقت کو جمع کریں جو آپ نے ایسی سرگرمیوں میں گزارا ہے جس سے آپ کے دل کی دھڑکن بڑھی یا آپ کو سانس لینے میں مشکل ہوئی۔

میں 0 1 2 3 4 5 6 7 دنوں کے لیے متحرک تھا۔

!ہمارے سوالات کا جواب دینے کے لیے آپ کا شکریہ

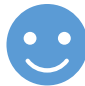

Supplement: f2 [file 9611010.f2.pdf]
