# Supplementary material for: Urdu Translation and Cross-Cultural Adaptation of Canadian Assessment of Physical Literacy-2 (CAPL-2) Questionnaires: A Reliability Analysis in Pakistani Children
Source: Hindawi journal article supplement (doi:10.1155/2024/9611010), 2024-02-29

# CAPL–2 Questionnaire

---

## What Do You Think About Physical Activity?

When we ask you about physical activity, we mean when you are moving around, playing, or exercising. *Physical activity* is any activity that makes your heart beat faster or makes you get out of breath some of the time.

## Why are we asking you these questions?

We want to know what kids, like you, think about physical activity, sports, and exercise.

## Please Remember:

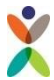

There are no right or wrong answers! We only want to know what you think.

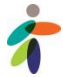

If you do not know an answer, please write your best guess.

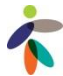

There is no time limit, so please take all of the time you need.

## What's Most Like Me?

For each question, you have to read two sentences and then circle the sentence you think is **MORE LIKE YOU**.

Try the following **SAMPLE QUESTION**:

**Some kids have one nose on their face BUT Other kids have three noses on their face**

That shouldn't be too hard for you to decide!

Once you have circled the sentence that is more like you, then you have to decide if it is **REALLY TRUE** for you or **SORT OF TRUE** for you.

Here is another sample question for you to try. Remember, to answer the question you need to do two things:

- 1) **First, circle the sentence that is more like you.**
- 2) **Then, put a check in the correct box if it is REALLY TRUE or SORT OF TRUE for you.**

THERE ARE NO RIGHT OR WRONG ANSWERS, JUST TELL US WHAT YOU THINK IS **MOST LIKE YOU!**

### Sample Question #2

|                                                               |                                                                |                                                                |
|---------------------------------------------------------------|----------------------------------------------------------------|----------------------------------------------------------------|
| <p><b>Some kids like to play with computers</b></p>           | <b>BUT</b>                                                     | <p><b>Other kids don't like playing with computers</b></p>     |
| <p><input type="checkbox"/> <b>REALLY TRUE</b><br/>for me</p> | <p><input type="checkbox"/> <b>SORT OF TRUE</b><br/>for me</p> | <p><input type="checkbox"/> <b>REALLY TRUE</b><br/>for me</p>  |
|                                                               |                                                                | <p><input type="checkbox"/> <b>SORT OF TRUE</b><br/>for me</p> |

Now you are ready to start filling in this form. **Remember, in each box you need to circle what is most like you and then check a box for "really" or "sort of" true.** Take your time and do the whole form carefully. If you have questions, just ask! If you think you are ready you can start now.

BE SURE TO FILL IN EACH PAGE!

## What’s Most Like Me?

|                                                        |            |                                                        |
|--------------------------------------------------------|------------|--------------------------------------------------------|
| <b>Some kids don’t like playing active games</b>       | <b>BUT</b> | <b>Other kids really like playing active games</b>     |
| <input type="checkbox"/> <b>REALLY TRUE</b><br>for me  |            | <input type="checkbox"/> <b>REALLY TRUE</b><br>for me  |
| <input type="checkbox"/> <b>SORT OF TRUE</b><br>for me |            | <input type="checkbox"/> <b>SORT OF TRUE</b><br>for me |

|                                                        |            |                                                        |
|--------------------------------------------------------|------------|--------------------------------------------------------|
| <b>Some kids are good at active games</b>              | <b>BUT</b> | <b>Other kids find active games hard to play</b>       |
| <input type="checkbox"/> <b>REALLY TRUE</b><br>for me  |            | <input type="checkbox"/> <b>REALLY TRUE</b><br>for me  |
| <input type="checkbox"/> <b>SORT OF TRUE</b><br>for me |            | <input type="checkbox"/> <b>SORT OF TRUE</b><br>for me |

|                                                        |            |                                                        |
|--------------------------------------------------------|------------|--------------------------------------------------------|
| <b>Some kids don’t have much fun playing sports</b>    | <b>BUT</b> | <b>Other kids have a good time playing sports</b>      |
| <input type="checkbox"/> <b>REALLY TRUE</b><br>for me  |            | <input type="checkbox"/> <b>REALLY TRUE</b><br>for me  |
| <input type="checkbox"/> <b>SORT OF TRUE</b><br>for me |            | <input type="checkbox"/> <b>SORT OF TRUE</b><br>for me |

|                                                        |            |                                                        |
|--------------------------------------------------------|------------|--------------------------------------------------------|
| <b>Some kids do well in most sports</b>                | <b>BUT</b> | <b>Other kids feel they aren’t good at sports</b>      |
| <input type="checkbox"/> <b>REALLY TRUE</b><br>for me  |            | <input type="checkbox"/> <b>REALLY TRUE</b><br>for me  |
| <input type="checkbox"/> <b>SORT OF TRUE</b><br>for me |            | <input type="checkbox"/> <b>SORT OF TRUE</b><br>for me |

|                                                        |            |                                                        |
|--------------------------------------------------------|------------|--------------------------------------------------------|
| <b>Some kids don’t like playing sports</b>             | <b>BUT</b> | <b>Other kids really enjoy playing sports</b>          |
| <input type="checkbox"/> <b>REALLY TRUE</b><br>for me  |            | <input type="checkbox"/> <b>REALLY TRUE</b><br>for me  |
| <input type="checkbox"/> <b>SORT OF TRUE</b><br>for me |            | <input type="checkbox"/> <b>SORT OF TRUE</b><br>for me |

|                                                        |            |                                                              |
|--------------------------------------------------------|------------|--------------------------------------------------------------|
| <b>Some kids learn to play active games easily</b>     | <b>BUT</b> | <b>Other kids find it hard learning to play active games</b> |
| <input type="checkbox"/> <b>REALLY TRUE</b><br>for me  |            | <input type="checkbox"/> <b>REALLY TRUE</b><br>for me        |
| <input type="checkbox"/> <b>SORT OF TRUE</b><br>for me |            | <input type="checkbox"/> <b>SORT OF TRUE</b><br>for me       |

**Thank you for telling us which kids are most like you!**

We just have a few more questions. Please turn to the next page.

## Why are you active?

Boys and girls can be **active** by doing all sorts of things:

- Exercise (walking, keeping fit, or gym class)
- Playing outside or doing active things (like playing in the park)
- Sports (like soccer, tennis, hockey, dance or swimming)

Below are some reasons why you might be active.

Please read each sentence and tell us how true it is for you.

| I am active because... |                          |                          |                          |                          |                          |
|------------------------|--------------------------|--------------------------|--------------------------|--------------------------|--------------------------|
|                        | Not true for me          | Not really true for me   | Sometimes true for me    | Often true for me        | Very true for me         |
| being active is fun    | <input type="checkbox"/> | <input type="checkbox"/> | <input type="checkbox"/> | <input type="checkbox"/> | <input type="checkbox"/> |
| I enjoy being active   | <input type="checkbox"/> | <input type="checkbox"/> | <input type="checkbox"/> | <input type="checkbox"/> | <input type="checkbox"/> |
| I like being active    | <input type="checkbox"/> | <input type="checkbox"/> | <input type="checkbox"/> | <input type="checkbox"/> | <input type="checkbox"/> |

## How do you feel about being active?

The next section has some sentences describing how girls and boys feel about BEING ACTIVE and DOING ACTIVE THINGS (like active games, playing outside and doing sports).

Please read each sentence and tell us how much each sentence is like you.

|                                                                  | Not like me at all       | Not really like me       | Sometimes like me        | Quite a lot like me      | Really like me           |
|------------------------------------------------------------------|--------------------------|--------------------------|--------------------------|--------------------------|--------------------------|
| When it comes to playing active games, I think I am pretty good. | <input type="checkbox"/> | <input type="checkbox"/> | <input type="checkbox"/> | <input type="checkbox"/> | <input type="checkbox"/> |
| I think I do well at activities compared to other children       | <input type="checkbox"/> | <input type="checkbox"/> | <input type="checkbox"/> | <input type="checkbox"/> | <input type="checkbox"/> |
| When it comes to being active, I have good skills.               | <input type="checkbox"/> | <input type="checkbox"/> | <input type="checkbox"/> | <input type="checkbox"/> | <input type="checkbox"/> |

## What do you know about physical activity?

Please circle only one answer for each question

1. How many minutes each day should you and other children do physical activities that make your heart beat faster and make you breathe faster, like walking fast or running? Count the time you should be active at school and also when you are at home or in your neighbourhood.

- a) 20 minutes
- b) 30 minutes
- c) 60 minutes or 1 hour
- d) 120 minutes or 2 hours

2. There are many different kinds of fitness. One type is called endurance fitness, or aerobic fitness, or cardiorespiratory fitness. Cardiorespiratory fitness means:

- a) How well the muscles can push, pull, or stretch
- b) How well the heart can pump blood and the lungs can provide oxygen
- c) Having a healthy weight for our height
- d) Our ability to do sports that we like

3. Muscular strength or muscular endurance means:

- a) How well the muscles can push, pull, or stretch
- b) How well the heart can pump blood and the lungs can provide oxygen
- c) Having a healthy weight for our height
- d) Our ability to do sports that we like

4. If you wanted to GET BETTER AT A SPORT SKILL (like kicking and catching a ball), what would be the best thing to do?

- a) Read a book about kicking and catching a ball
- b) Wait until you get older
- c) Try exercising or being more active
- d) Watch a video, take a lesson, or have a coach teach you how to kick and catch

5. This story about Sally is missing some words. Choose from the words in the box to fill in the missing words in the story. Each word can only be used to fill one blank space in the story. There are more words than blank spaces, so not all words will be used.

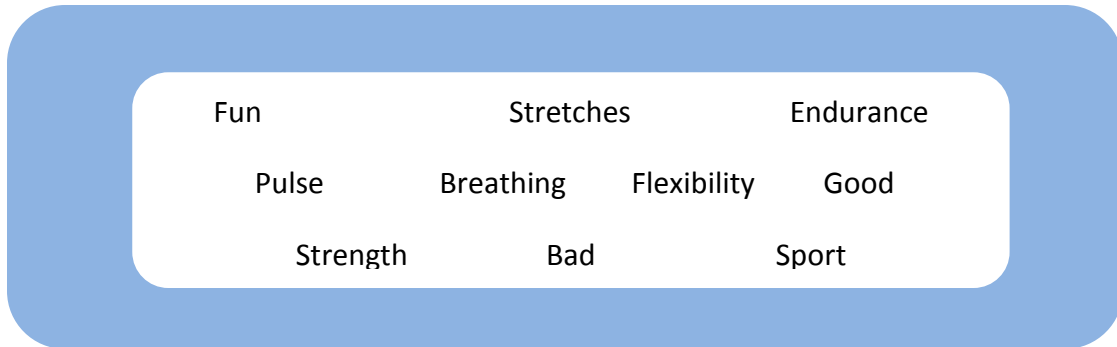

Sally tries to be active every day. Running every day is good for her heart and her lungs. Sally thinks that physical activity is \_\_\_\_\_ and is also \_\_\_\_\_ for her. At her sport team's practice she does more running to improve her \_\_\_\_\_. The team also does exercises like push-ups and sit-ups that increase her \_\_\_\_\_. When cooling down, she \_\_\_\_\_ to improve her flexibility and slow her heart rate. After exercising, she checks her heart rate which is also called a \_\_\_\_\_.

6. During the past week (7 days), on how many days were you physically active for a total of at least 60 minutes per day? Count all of the time you spent doing activities that increase your heart rate or made you breathe hard.

I was active for      0      1      2      3      4      5      6      7      days

## Tell us about yourself!

Please circle one number, or word, or choice for each question

### What school grade are you in?

If you are not in school today, please circle the grade you will be in on the next day that you will go to school.

0    1    2    3    4    5    6

### Are you a:

Boy

Girl

### What month is your birthday in?

Jan   Feb   Mar   Apr   May   Jun   Jul   Aug   Sep   Oct   Nov   Dec

### How old are you?

5    6    7    8    9    10    11    12    13    14    15

Thank you for answering our questions!

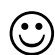

Supplement: f3 [file 9611010.f3.pdf]
