# Supplementary material for: Urdu Translation and Cross-Cultural Adaptation of Canadian Assessment of Physical Literacy-2 (CAPL-2) Questionnaires: A Reliability Analysis in Pakistani Children
Source: Hindawi journal article supplement (doi:10.1155/2024/9611010), 2024-02-29
Supplement: f1 [file 9611010.f1.docx]

**Additional file 1.** Examples of the changes made during the translation and Cross-cultural adaptation process of CAPL-2 questionnaire.

| **English Version (Original)** | | **T3 Urdu Version** | | **Changes made in Step 4** | | **Changes made in Step 6** |
| --- | --- | --- | --- | --- | --- | --- |
| You are moving around, playing, or exercising. | آپ کب جسمانی سرگرمی کرتے ہیں، کھیل رہے ہیں یا ورزش کر رہے ہیں۔ | | آپ کب گھومتے پھرتے ہیں، کھیتے ہیں یا ورزش کر رتےہیں۔ | | Agreed | | |
| What’s Most Like Me? | میرے جیسا کون ھے۔ | | کون سا جملہ آپ کےجواب سےزیادہ مشابہت رکھتاہے! | | Agreed | | |
| Makes you get out of breath some of the time. | آپ کو کچھ وقت تک سانس لینےکی رفتار کو بڑھادیتی ہے | | کچھ وقت تک آپ کے سانس لینے کی رفتار کو بڑھادیتی ہے ۔ | | Agreed | | |
| Write your best guess. | اپنا بہترین تکا لگاۓ ۔ | | براہ کرم اپنا بہترین اندازےکا انتخاب کریں ۔ | | Agreed | | |
| Then circle the sentence you think is more like you. | جو آپ کو اپنے جیسا لگتا ہے۔ | | آس فقرے کے گرد دارہ لگاۓ جو آپ کو لگتا ہے کہ آپ سےزیادہ مشابہت رکھتاہے۔ | | Agreed | | |
| Really true for me/Sort of true for me. | بلکل درست ھے۔ / کچھ کچھ درست ھے۔ | | میرے لیے سچ ہے۔/ کچھ حد تک میرے لیے درست ہے۔ | | میں بلکل ایساہوں۔/ کچھ حد تک میں ایسا ہے۔ | | |
| Playing active games. | کچھ بچے چست کھیل ۔ | | متحرک کھیل کھیلنا۔ | | Agreed | | |
| Other kids find active games hard to play. | کچھ بچے چست کھیل دشواری سے کھیلتے ہیں۔ | | دوسرے بچوں کو متحرک کھیل کھیلنا مشکل لگتا ہے۔ | | Agreed | | |
| Other kids feel they aren’t good at sports. | بچے کھیل میں اچھی کارکردگی نہیں دکھا پاتے۔ | | دوسرے بچوں کو لگتا ہے کہ وہ کھیلوں میں ا اچھی کارکردگی کا مضاہرھ نہیں کر سکتے۔ | | دوسرے بچوں کو لگتا ہے کہ وہ کھیلوں میں اچھے نہیں ہیں۔ | | |
| Other kids find it hard learning to play active games. | دوسرے کچھ بچے کہ متحرک کھیل کھیلنا کو سیکھنا مشکل محسوس کرتے ہیں ۔ | | دوسرے کچھ بچوں کو متحرک کھیل سیکھنا مشکل محسوس ہوتا ہے ۔ | | Agreed | | |
| walking, keeping fit, or gym class. | ورزش (چلنا، فٹ رکھنا، یا جم کلاس) | | ورزش (چلنےپھرنےسے، تندرست رہنے سے، یا جم کلاس سے)۔ | | Agreed | | |
| Like soccer, tennis, hockey, dance, or swimming. | جیسے فٹ بال، ٹینس، ہاکی، رقص، یا تیراکی | | کھیل (جیسے کہ فٹ بال، ٹینس، ہاکی، رقص، یا تیراکی سے) ۔ | | Agreed | | |
| Not true for me.  Not really true for me.  Sometimes true for me.  Often true for me.  Very true for me. | میرے لیے سچ نہیں ہے۔  میرے لیے واقعی سچ نہیں ہے۔  کبھی کبھی میرے لئے سچ ہے۔  اکثر میرے لیے سچ ہے۔  میرے لیے بہت سچ ہے۔ | | میرے لیے درست نہیں ہے۔  میرے لیے بلکل بھی درست نہیں ہے۔  بعض اوقات میرے لئے سچ ہے۔  بسا اوقات میرے لیے سچ ہے۔  میرے لیے بلکل درست ہے۔ | | Agreed | | |
| Aerobic Fitness, Cardiorespiratory Fitness. Push, Pull, Or Stretch. Muscular Strength. | ایروبک ورزش ، عضلاتی فٹنس، دھکا، کھینچنا، یا کھینچنا۔- پٹھوں کی طاقت | | ایروبک ورزش ، قلبی تنفس کی فٹنس، دھکا، کھینچنا، یا پھیلانا،  پٹھوں کی طاقت یا پٹھوں کی برداشت | | Agreed | | |
| Running every day is good for her heart and her lungs. | ہر روز دوڑنا اس کے دل اور پھیپھڑوں کے لیے اچھا ہے۔ | | ہر روز دوڑنا اس کے دل اور پھیپھڑوں (جسمانی عضلت) کے لیے اچھا ہے۔ | | Agreed | | |
| When cooling down, Stretches, Endurance. | ٹھنڈا کرنا، لچک، بَرْداشْت۔ | | جسم کو ٹھنڈا کرنا، جسم کی لچک، بَرْداشْت کی صلاحیت۔ | | ہاتھ پیر پھیلانے کی ورزش | | |
| That increase your heart rate or made you breathe hard. | جن سے آپ کے دل کی دھڑکن بڑھ جاتی ہے یا آپ کو سانس لینے میں مشکل ہوتی ہے | | جس سے آپ کے دل کی دھڑکن بڑھی یا آپ کو سانس لینے میں مشکل ہوئ۔ | | Agreed | | |
